# Supplementary material
Source: publisher figshare collection journal article supplement (https://gsapubs.figshare.com/ndownloader/files/36561339)
Supplement: Supplementary file 1 [file 36561339]

## Sheet: Sheet1 (2)
Table S2 Major element composition of columbite in the granite apophysis
	KTH2-CLB-01	KTH2-CLB-03	KTH2-CLB-04	KTH2-CLB-05	KTH2-CLB-06	KTH2-CLB-07	KTH2-CLB-08	KTH2-CLB-09	KTH2-CLB-10	KTH2-CLB-11	KTH2-CLB-12	KTH2-CLB-13	KTH2-CLB-15	KTH2-CLB-16	KTH2-CLB-17	KTH2-CLB-18	KTH2-CLB-20	KTH2-CLB-21	KTH2-CLB-22	KTH2-CLB-23	KTH2-CLB-24	KTH2-CLB-25	KTH2-CLB-26	KTH2-CLB-28	KTH2-CLB-29	KTH2-CLB-30	KTH2-CLB-31	KTH2-CLB-33	KTH2-CLB-34	KTH2-CLB-35
SiO2	0.139	0.105	0.748	0.077	0.183	0.077	0.096	0.24	0.024	0.05	0.081	0.193	0.151	0.097	0.554	0.783	0.704	0.092	0.722	0.178	0.221	0.084	0	0.589	0.13	0.132	1.173	0.134	0.063	0.272
MnO	10.553	8.355	8.343	8.332	7.646	11.192	8.743	7.565	8.052	8.481	8.623	7.548	7.809	13.161	8.266	8.165	8.288	8.299	7.846	11.508	7.748	8.578	8.855	8.345	8.1	8.167	8.23	8.005	8.532	9.838
Nb2O5	37.878	44.233	41.33	42.276	31.117	40.432	38.524	30.375	48.226	47.124	44.761	32.759	32.433	42.474	47.035	43.869	45.688	42.862	42.509	36.756	31.57	43.075	50.499	46.405	36.129	35.201	32.231	41.059	41.329	29.571
WO3	1.877	1.855	2.025	1.716	2.191	1.671	1.894	2.317	1.818	2.012	1.691	2.532	2.002	2.033	1.782	1.97	1.712	1.751	2.047	1.98	2.317	1.972	1.684	2.219	2.192	2.107	2.326	1.992	1.863	2.644
FeO	4.577	6.362	6.204	6.139	6.062	4.316	5.683	5.951	6.576	6.238	6.051	6.16	6.109	2.974	6.367	6.521	6.305	6.16	6.405	3.863	6.034	5.933	6.275	6.307	5.96	5.923	5.682	6.321	6.092	4.462
TiO2	0.347	0.505	0.671	0.426	0.701	0.305	0.669	0.558	0.46	0.526	0.437	0.568	0.538	0.418	0.453	0.418	0.443	0.491	0.634	0.38	0.63	0.697	0.509	0.467	0.502	0.437	0.557	0.526	0.674	0.424
Ta2O5	44.601	37.066	40.755	40.987	53.126	41.317	43.7	53.452	35.143	34.967	37.826	48.794	50.239	40.282	35.69	39.897	37.609	39.602	39.512	46.483	52.591	39.461	31.162	35.207	46.439	47.378	51.27	42.672	40.377	53.387
Total	99.972	98.481	100.076	99.953	101.026	99.31	99.309	100.458	100.299	99.398	99.47	98.554	99.281	101.439	100.147	101.623	100.749	99.257	99.675	101.148	101.111	99.8	98.984	99.539	99.452	99.345	101.469	100.709	98.93	100.598
Mn/(Mn+Fe)	0.700171	0.570836	0.576635	0.578883	0.560918	0.724245	0.609098	0.562846	0.553603	0.579304	0.590723	0.553779	0.564209	0.817589	0.568018	0.559116	0.571068	0.577082	0.55371	0.751073	0.565317	0.594215	0.588352	0.572669	0.579212	0.582733	0.594652	0.561914	0.586519	0.690702
Ta/(Ta+Nb)	0.414625	0.335138	0.372321	0.368367	0.506662	0.380692	0.405597	0.514221	0.304759	0.308607	0.33702	0.472569	0.482345	0.363258	0.313397	0.353619	0.331179	0.357238	0.358616	0.432053	0.500518	0.355284	0.270711	0.313367	0.436047	0.4474	0.48898	0.38468	0.370151	0.520616

## Sheet: Sheet1
	KTH2-CLB-01	KTH2-CLB-02	KTH2-CLB-03	KTH2-CLB-04	KTH2-CLB-05	KTH2-CLB-06	KTH2-CLB-07	KTH2-CLB-08	KTH2-CLB-09	KTH2-CLB-10	KTH2-CLB-11	KTH2-CLB-12	KTH2-CLB-13	KTH2-CLB-14	KTH2-CLB-15	KTH2-CLB-16	KTH2-CLB-17	KTH2-CLB-18	KTH2-CLB-19	KTH2-CLB-20	KTH2-CLB-21	KTH2-CLB-22	KTH2-CLB-23	KTH2-CLB-24	KTH2-CLB-25	KTH2-CLB-26	KTH2-CLB-27	KTH2-CLB-28	KTH2-CLB-29	KTH2-CLB-30	KTH2-CLB-31	KTH2-CLB-32	KTH2-CLB-33	KTH2-CLB-34	KTH2-CLB-35
SiO2	0.139		0.105	0.748	0.077	0.183	0.077	0.096	0.24	0.024	0.05	0.081	0.193		0.151	0.097	0.554	0.783		0.704	0.092	0.722	0.178	0.221	0.084	0		0.589	0.13	0.132	1.173		0.134	0.063	0.272
MnO	10.553		8.355	8.343	8.332	7.646	11.192	8.743	7.565	8.052	8.481	8.623	7.548		7.809	13.161	8.266	8.165		8.288	8.299	7.846	11.508	7.748	8.578	8.855		8.345	8.1	8.167	8.23		8.005	8.532	9.838
Nb2O5	37.878		44.233	41.33	42.276	31.117	40.432	38.524	30.375	48.226	47.124	44.761	32.759		32.433	42.474	47.035	43.869		45.688	42.862	42.509	36.756	31.57	43.075	50.499		46.405	36.129	35.201	32.231		41.059	41.329	29.571
WO3	1.877		1.855	2.025	1.716	2.191	1.671	1.894	2.317	1.818	2.012	1.691	2.532		2.002	2.033	1.782	1.97		1.712	1.751	2.047	1.98	2.317	1.972	1.684		2.219	2.192	2.107	2.326		1.992	1.863	2.644
FeO	4.577		6.362	6.204	6.139	6.062	4.316	5.683	5.951	6.576	6.238	6.051	6.16		6.109	2.974	6.367	6.521		6.305	6.16	6.405	3.863	6.034	5.933	6.275		6.307	5.96	5.923	5.682		6.321	6.092	4.462
TiO2	0.347		0.505	0.671	0.426	0.701	0.305	0.669	0.558	0.46	0.526	0.437	0.568		0.538	0.418	0.453	0.418		0.443	0.491	0.634	0.38	0.63	0.697	0.509		0.467	0.502	0.437	0.557		0.526	0.674	0.424
Ta2O5	44.601		37.066	40.755	40.987	53.126	41.317	43.7	53.452	35.143	34.967	37.826	48.794		50.239	40.282	35.69	39.897		37.609	39.602	39.512	46.483	52.591	39.461	31.162		35.207	46.439	47.378	51.27		42.672	40.377	53.387
-------------------------------------------------------------------------
Total	99.972		98.481	100.076	99.953	101.026	99.31	99.309	100.458	100.299	99.398	99.47	98.554		99.281	101.439	100.147	101.623		100.749	99.257	99.675	101.148	101.111	99.8	98.984		99.539	99.452	99.345	101.469		100.709	98.93	100.598
